# Supplementary material
Source: Springer Nature journal article supplement (https://www.springermedizin.de/resource/supplementary/12985_2010_946_MOESM1_ESM.pdf/9608802)

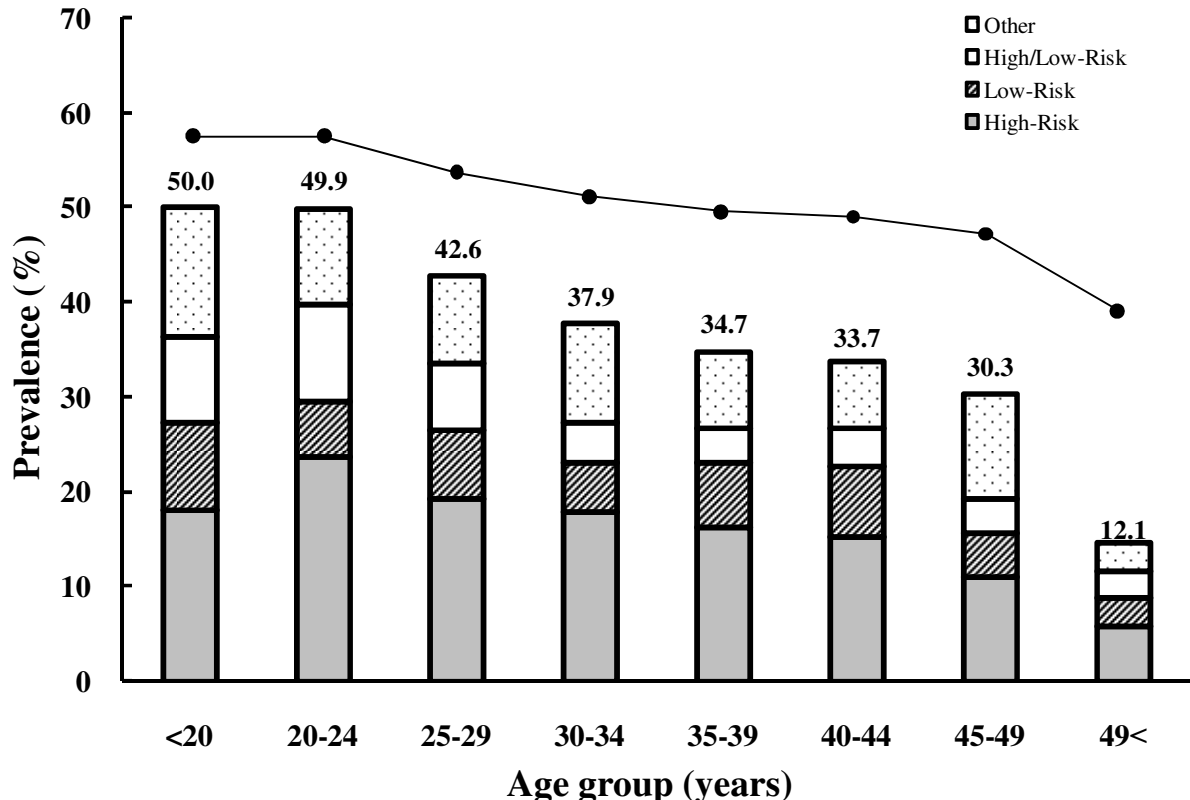

Supplement: MOESM1 [file 9608802]
